# Supplementary material
Source: PubMed Central journal article supplement (PMC2781641)

**Figure S1 Expression of the wild-type and mutant  $\beta_2$ ARs.** A) Myocytes were infected with equivalent moi of flag-tagged wild type and mutant  $\beta_2$ AR viruses. Receptors were western blotted with anti-flag antibody. The data represents at least three individual experiments. B) HEK293 cells were infected with equal amount of receptor viruses. After 24 h expression, membranes were prepared from cell lysate using hypotonic buffer, and the  $\beta_2$ ARs were labeled with [ $^3$ H] dihydroalprenolol. Radioactivity was measured, normalized, and plotted (N =3).

**Figure S2 Detection of PKA and GRK phosphorylation of mutant  $\beta_2$ ARs.** A) The flag-tagged wild type and mutant  $\beta_2$ ARs were expressed in HEK293 cells. Receptors were stimulated with 10  $\mu$ M of Iso for 10 min and blotted for PKA site phosphorylation (pS261/262) and GRK site phosphorylation (p355/356) using phospho-specific antibodies. The data represents at least three individual experiments.

A

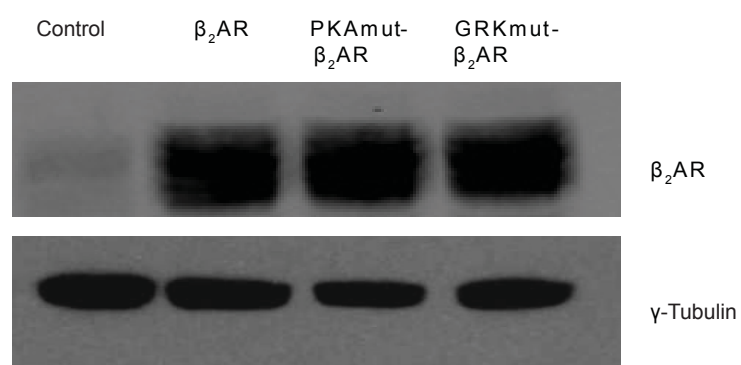

B

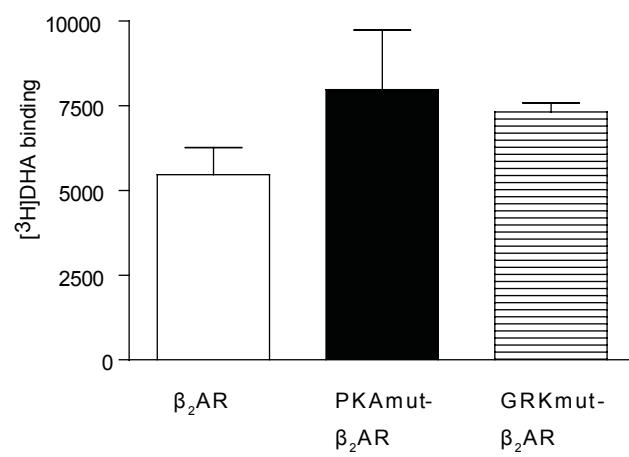

S2

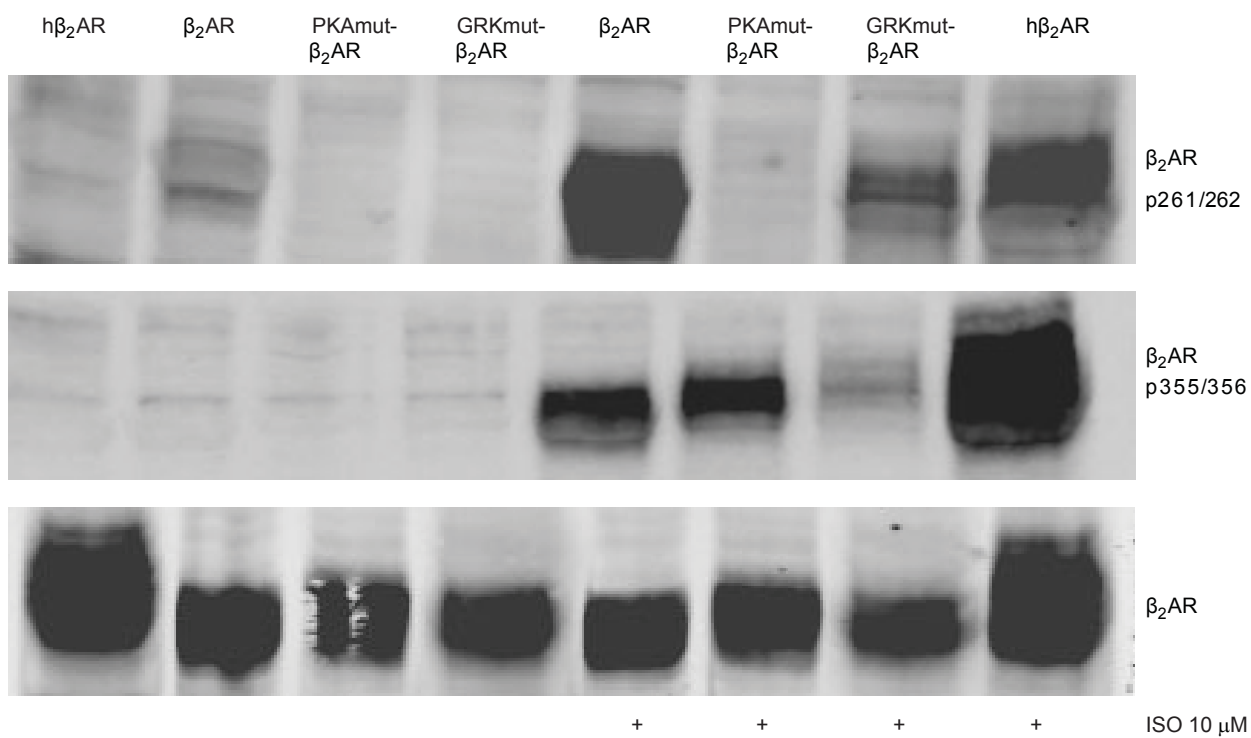

Supplement: supp_M109.021428_jbc.M109.021428-1.pdf [file supp_M109.021428_jbc.M109.021428-1.pdf]
